# Supplementary material
Source: MDPI journal article supplement (https://www.mdpi.com/2227-9040/10/10/410)
Supplement: s1 [file s1]

Article

# Using Near-Infrared Spectroscopy and Stacked Regression for the Simultaneous Determination of Fresh Cattle and Poultry Manure Chemical Properties

Elizabeth Cobbinah <sup>1,†</sup>, Oliver Generalao <sup>2,†</sup>, Sathish Kumar Lageshetty <sup>3</sup>, Indra Adrianto <sup>4,5</sup>, Seema Singh <sup>6</sup> and Gerard G. Dumancas <sup>1,\*</sup>

<sup>1</sup> Department of Chemistry, Loyola Science Center, The University of Scranton, Scranton, PA 18510, USA

<sup>2</sup> Center for Informatics, University of San Agustin, Gen. Luna St, Iloilo City 5000, Philippines

<sup>3</sup> Research and Development Department, CHASM Advanced Materials, 2501 Technology Place, Norman, OK 73071, USA

<sup>4</sup> Department of Public Health Sciences, Henry Ford Health, Detroit, MI 48202, USA

<sup>5</sup> Department of Medicine, Michigan State University, East Lansing, MI 48824, USA

<sup>6</sup> Sandia National Laboratories and Joint Bioenergy Institute, Livermore, CA 94550, USA

\* Correspondence: gerard.dumancas@scranton.edu; Tel.: +1-405-730-8752

† These authors contributed equally to this work.

## Supplementary figures

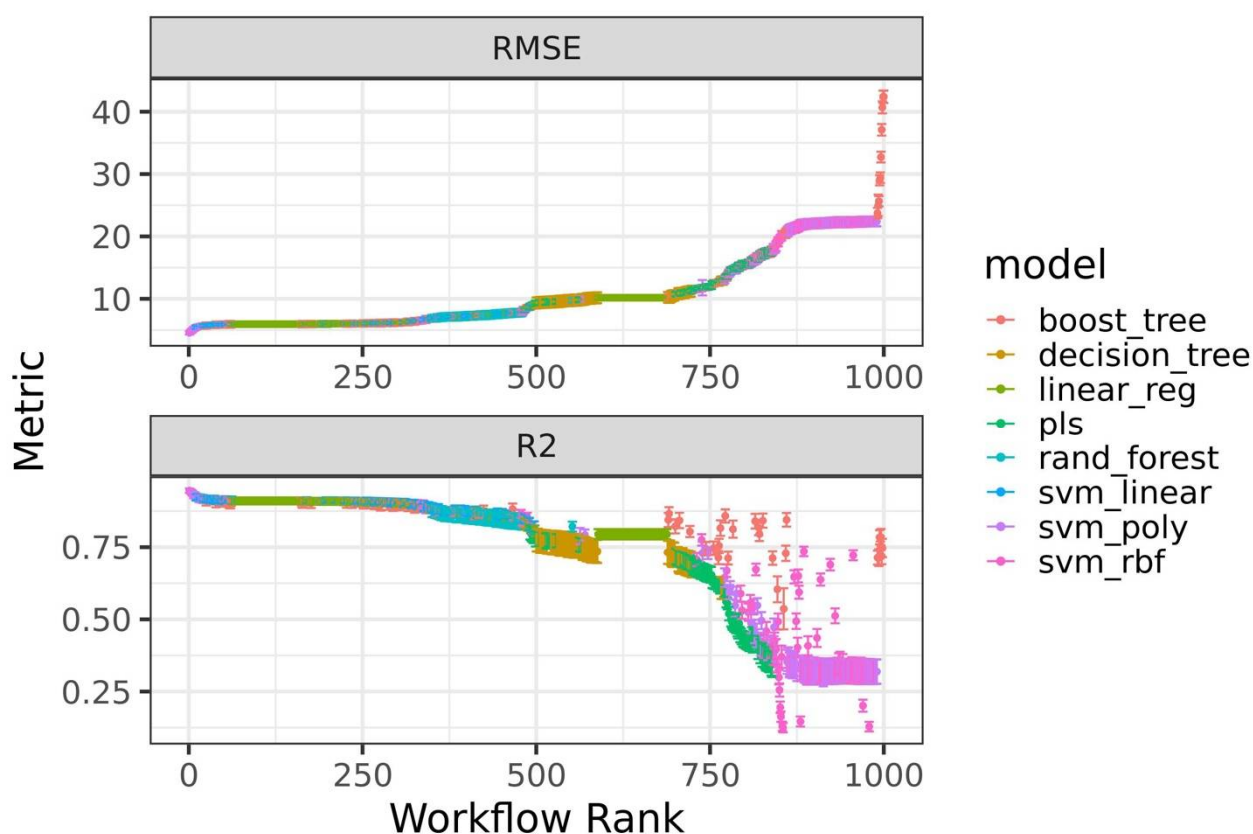

**Figure S1.** Workflow rank of the machine learning technique used in the dry matter analysis for the stacked regression. The figure shows the model configuration on the horizontal axis with the ranks decreasing from left to right (the value of one being the best) versus the performance metrics (RMSE and  $R^2$ ) on the vertical axis on the cross-validation sets. The vertical lines for each point represent a 90% confidence bound for each model configuration. The statistical techniques used are the following: svm\_linear = support vector regression with linear kernel; svm\_poly = support vector regression

with polynomial kernel; svm\_rbf = support vector regression with radial kernel; linear\_reg (includes least absolute shrinkage and selection operator (LASSO), ridge regression and elastic net regression) pls = Partial least squares; rand\_forest = Random forests via randomForest; decision\_tree = recursive partitioning and regression trees ; boost\_tree = Boosted trees. The mentioned models with different configurations were used as the Level 1 models in the stack regression workflow.

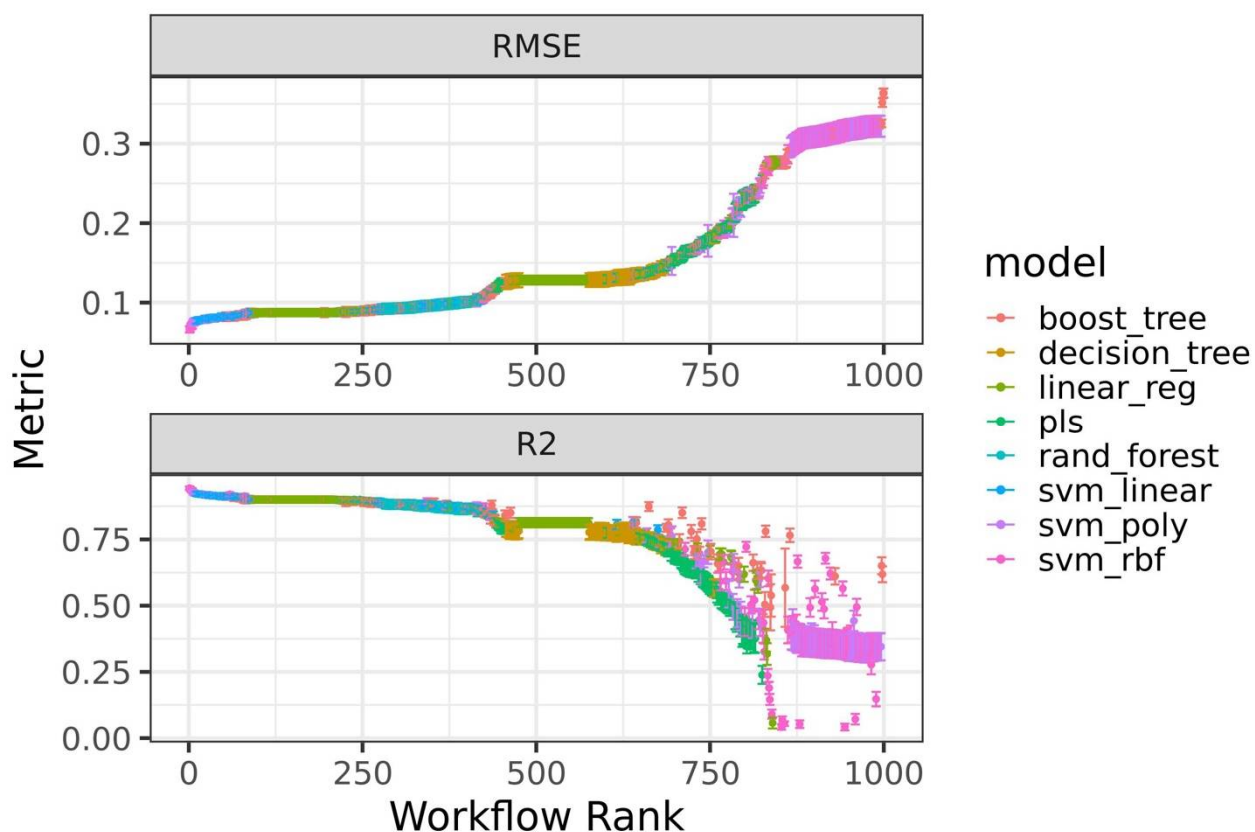

**Figure S2.** Workflow rank of the machine learning technique used in the  $\text{NH}_4$  analysis for the stacked regression. The figure shows the model configuration on the horizontal axis with the ranks decreasing from left to right (the value of one being the best) versus the performance metrics (RMSE and  $R^2$ ) on the vertical axis on the cross-validation sets. The vertical lines for each point represent a 90% confidence bound for each model configuration. The statistical techniques used are the following: svm\_linear = support vector regression with linear kernel; svm\_poly = support vector regression with polynomial kernel; svm\_rbf = support vector regression with radial kernel; linear\_reg (includes least absolute shrinkage and selection operator (LASSO), ridge regression and elastic net regression) pls = Partial least squares; rand\_forest = Random forests via randomForest; decision\_tree = recursive partitioning and regression trees; boost\_tree = Boosted trees. The mentioned models with different configurations were used as the Level 1 models in the stack regression workflow.

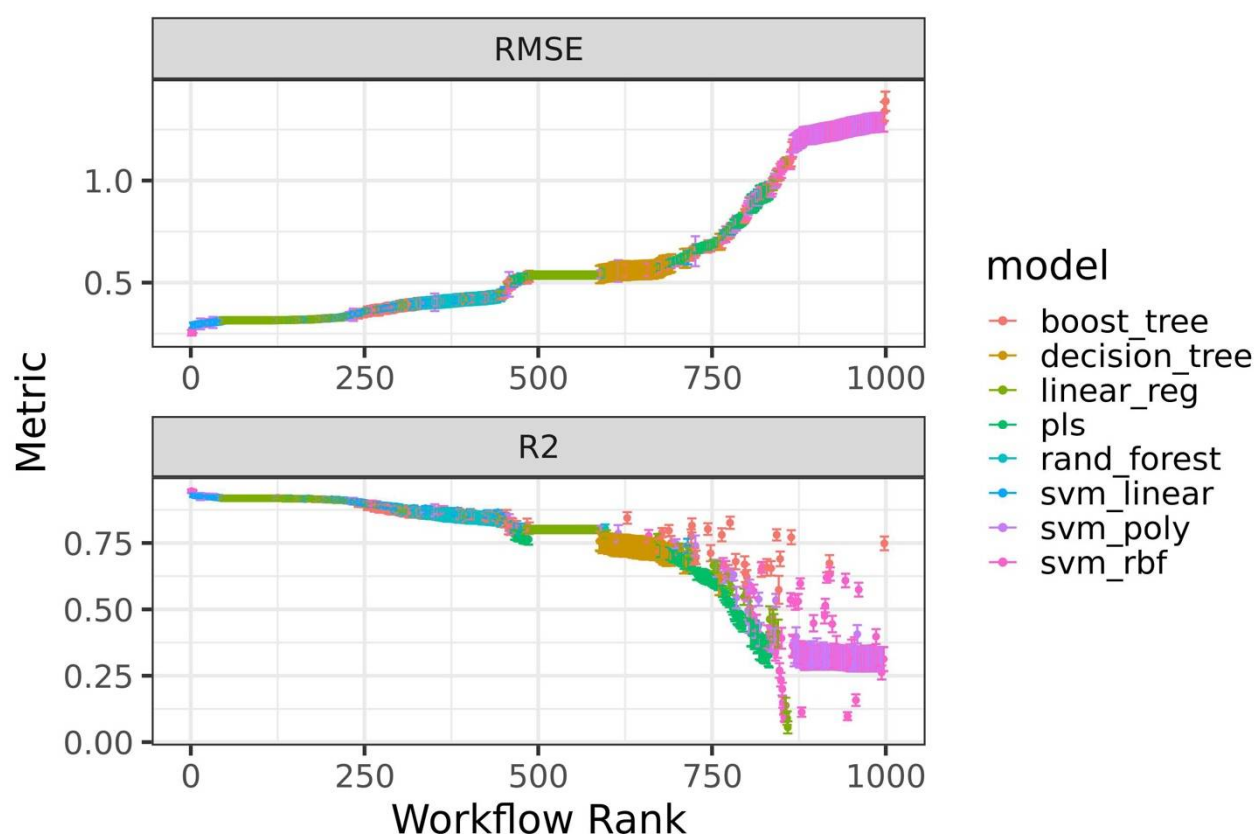

**Figure S3.** Workflow rank of the machine learning technique used in the total N analysis for the stacked regression. The figure shows the model configuration on the horizontal axis with the ranks decreasing from left to right (the value of one being the best) versus the performance metrics (RMSE and  $R^2$ ) on the vertical axis on the cross-validation sets. The vertical lines for each point represent a 90% confidence bound for each model configuration. The statistical techniques used are the following; svm\_linear = support vector regression with linear kernel; svm\_poly = support vector regression with polynomial kernel; svm\_rbf = support vector regression with radial kernel; linear\_reg (includes least absolute shrinkage and selection operator (LASSO), ridge regression and elastic net regression) pls = Partial least squares; rand\_forest = Random forests via randomForest; decision\_tree = recursive partitioning and regression trees; boost\_tree = Boosted trees. The mentioned models with different configurations were used as the Level 1 models in the stack regression workflow.

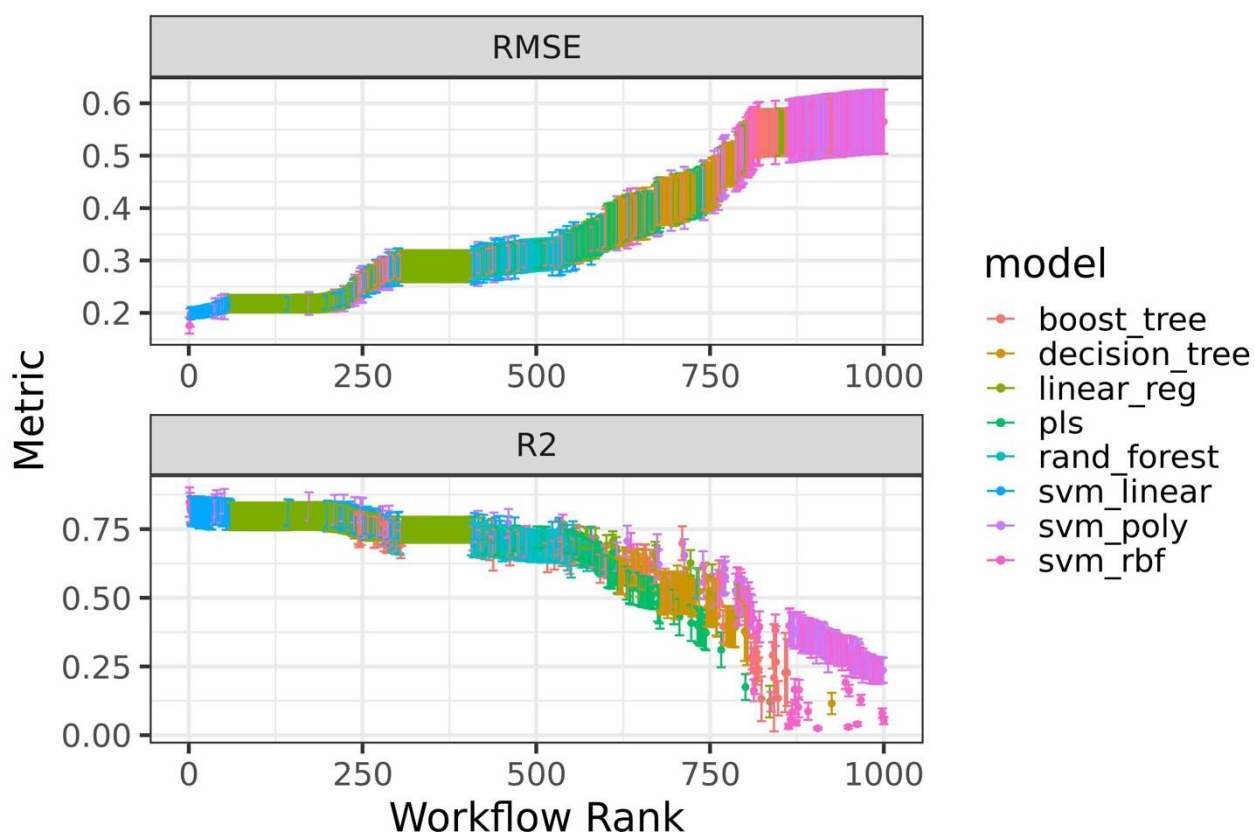

**Figure S4.** Workflow rank of the machine learning technique used in the  $P_2O_5$  analysis for the stacked regression. The figure shows the model configuration on the horizontal axis with the ranks decreasing from left to right (the value of one being the best) versus the performance metrics (RMSE and  $R^2$ ) on the vertical axis on the cross-validation sets. The vertical lines for each point represent a 90% confidence bound for each model configuration. The statistical techniques used are the following; svm\_linear = support vector regression with linear kernel; svm\_poly = support vector regression with polynomial kernel; svm\_rbf = support vector regression with radial kernel; linear\_reg (includes least absolute shrinkage and selection operator (LASSO), ridge regression and elastic net regression) pls = Partial least squares; rand\_forest = Random forests via randomForest; decision\_tree = recursive partitioning and regression trees; boost\_tree = Boosted trees. The mentioned models with different configurations were used as the Level 1 models in the stack regression workflow.

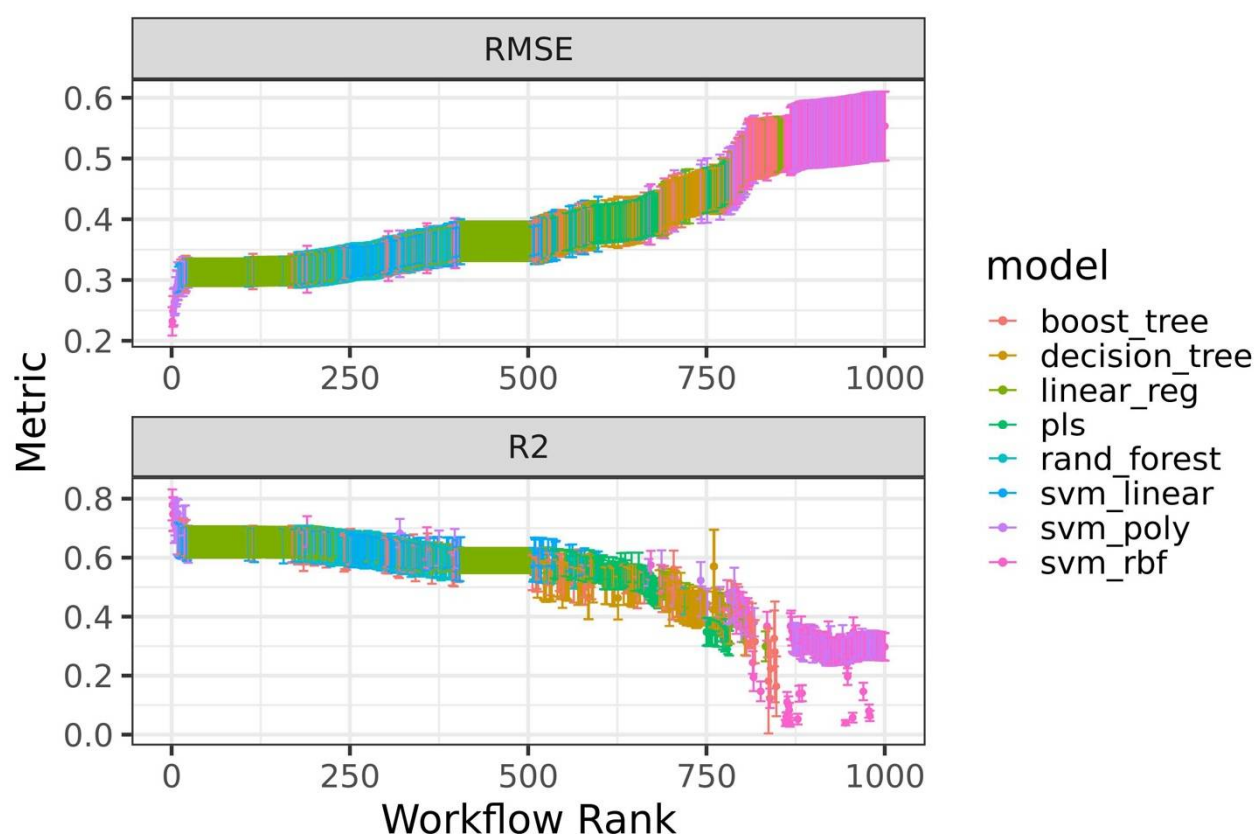

**Figure S5.** Workflow rank of the machine learning technique used in the CaO analysis for the stacked regression. The figure shows the model configuration on the horizontal axis with the ranks decreasing from left to right (the value of one being the best) versus the performance metrics (RMSE and  $R^2$ ) on the vertical axis on the cross-validation sets. The vertical lines for each point represent a 90% confidence bound for each model configuration. The statistical techniques used are the following; svm\_linear = support vector regression with linear kernel; svm\_poly = support vector regression with polynomial kernel; svm\_rbf = support vector regression with radial kernel; linear\_reg (includes least absolute shrinkage and selection operator (LASSO), ridge regression and elastic net regression) pls = Partial least squares; rand\_forest = Random forests via randomForest; decision\_tree = recursive partitioning and regression trees; boost\_tree = Boosted trees. The mentioned models with different configurations were used as the Level 1 models in the stack regression workflow.

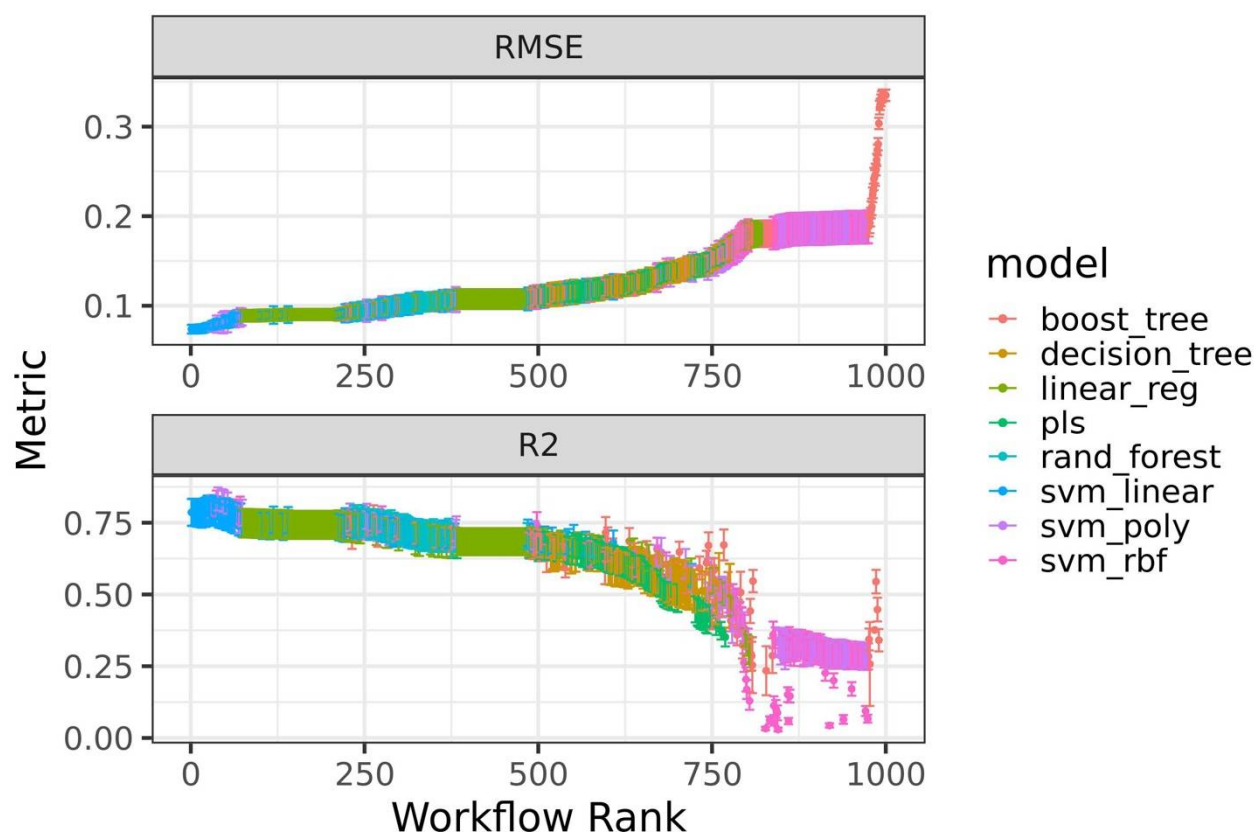

**Figure S6.** Workflow rank of the machine learning technique used in the MgO analysis for the stacked regression. The figure shows the model configuration on the horizontal axis with the ranks decreasing from left to right (the value of one being the best) versus the performance metrics (RMSE and  $R^2$ ) on the vertical axis on the cross-validation sets. The vertical lines for each point represent a 90% confidence bound for each model configuration. The statistical techniques used are the following; svm\_linear = support vector regression with linear kernel; svm\_poly = support vector regression with polynomial kernel; svm\_rbf = support vector regression with radial kernel; linear\_reg (includes least absolute shrinkage and selection operator (LASSO), ridge regression and elastic net regression) pls = Partial least squares; rand\_forest = Random forests via randomForest; decision\_tree = recursive partitioning and regression trees; boost\_tree = Boosted trees. The mentioned models with different configurations were used as the Level 1 models in the stack regression workflow.

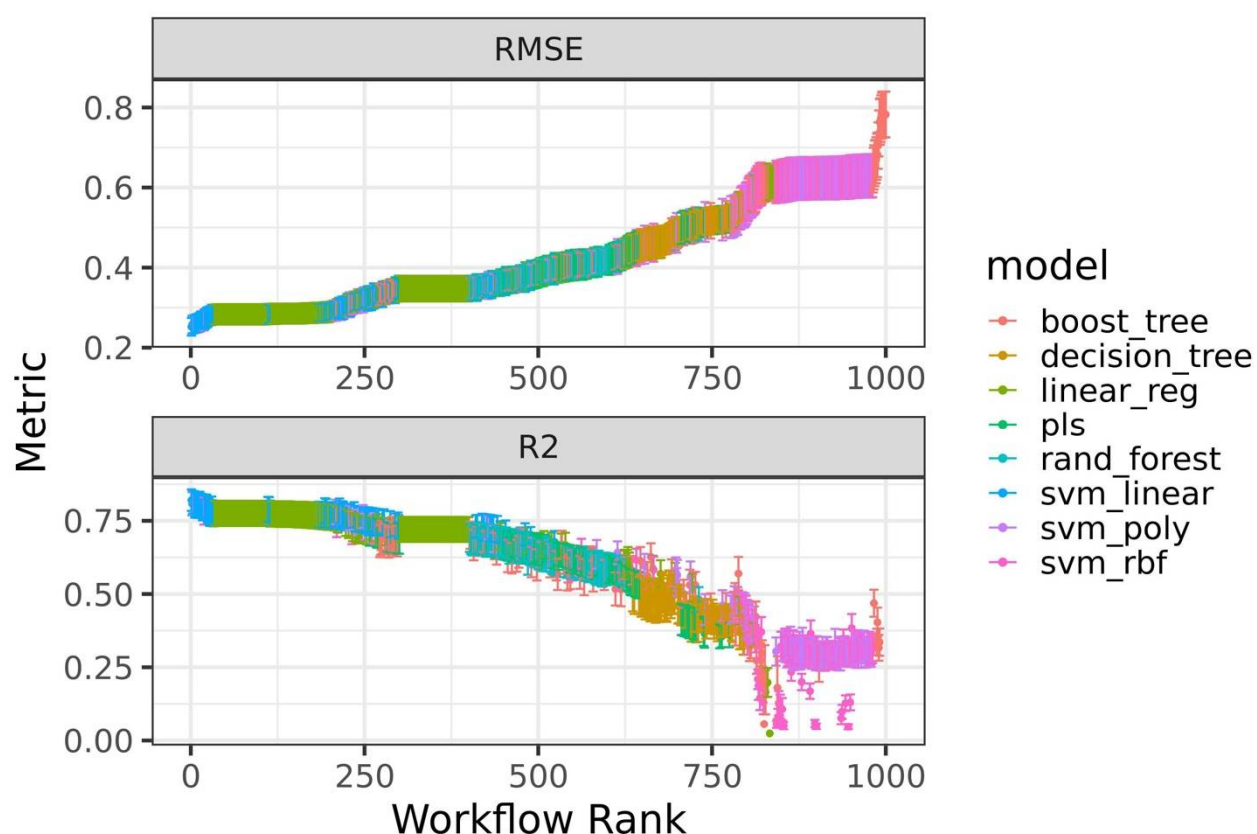

**Figure S7.** Workflow rank of the machine learning technique used in the K<sub>2</sub>O analysis for the stacked regression. The figure shows the model configuration on the horizontal axis with the ranks decreasing from left to right (the value of one being the best) versus the performance metrics (RMSE and R<sup>2</sup>) on the vertical axis on the cross-validation sets. The vertical lines for each point represent a 90% confidence bound for each model configuration. The statistical techniques used are the following; svm\_linear = support vector regression with linear kernel; svm\_poly = support vector regression with polynomial kernel; svm\_rbf = support vector regression with radial kernel; linear\_reg (includes least absolute shrinkage and selection operator (LASSO), ridge regression and elastic net regression) pls = Partial least squares; rand\_forest = Random forests via randomForest; decision\_tree = recursive partitioning and regression trees; boost\_tree = Boosted trees. The mentioned models with different configurations were used as the Level 1 models in the stack regression workflow.



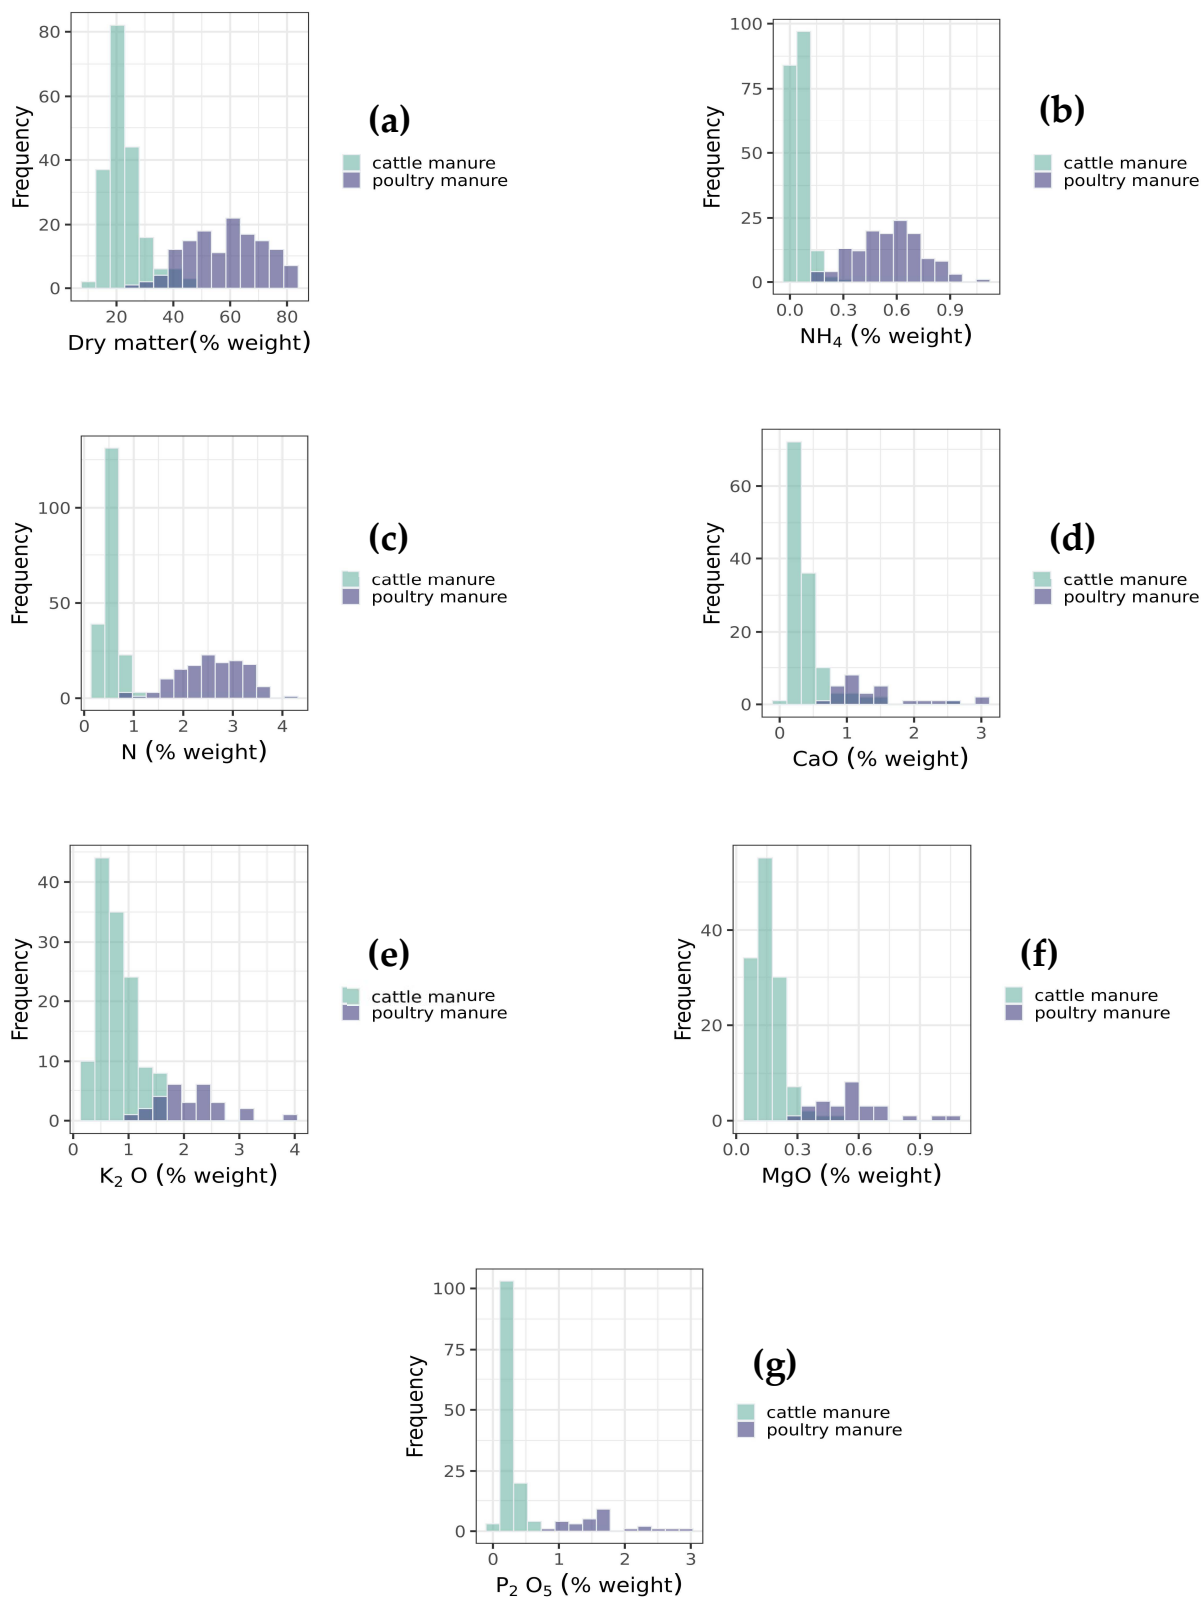

**Figure S8.** Histograms for the 332 samples of (a) dry matter, (b) total ammonium nitrogen ( $\text{NH}_4$ ), (c) total nitrogen (N), and 158 samples of (d) CaO, (e)  $\text{K}_2\text{O}$ , (f) MgO, (g)  $\text{P}_2\text{O}_5$  in the entire dataset before splitting.



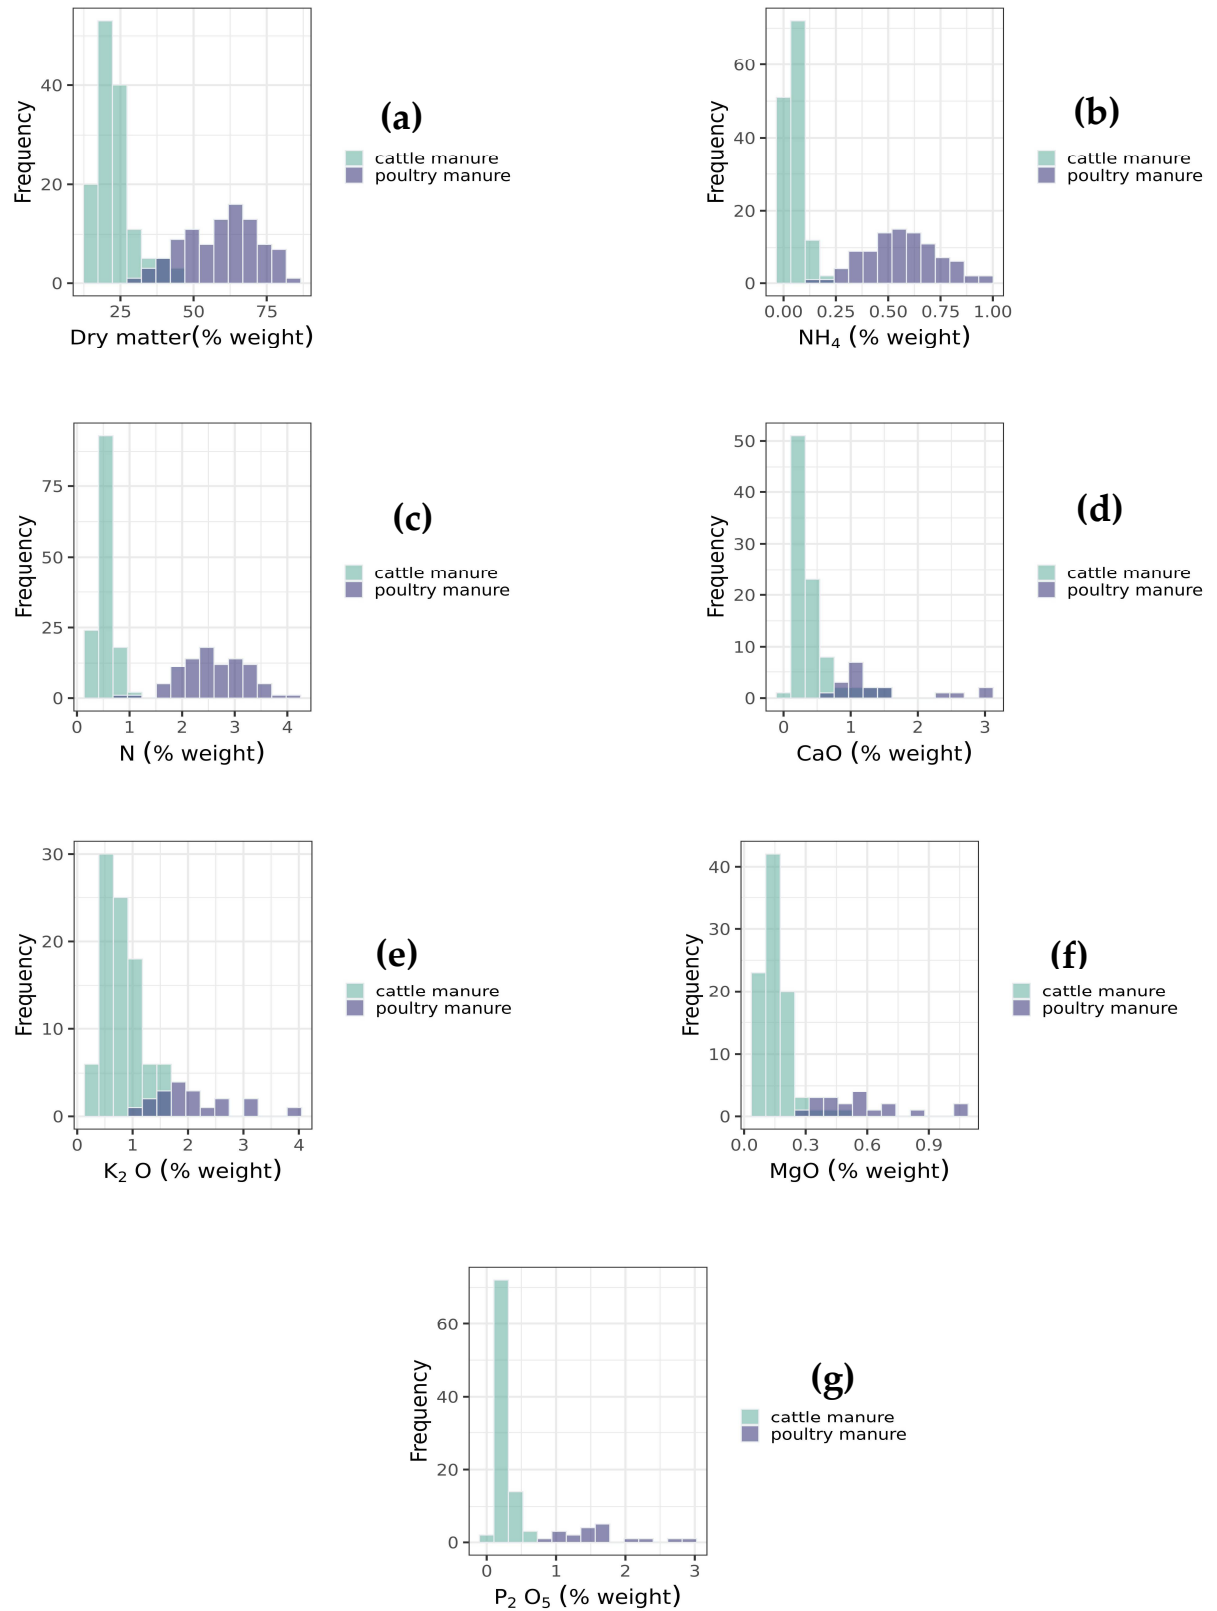

**Figure S9.** Histograms for the 232 samples of (a) dry matter, (b) total ammonium nitrogen ( $\text{NH}_4$ ), (c) total nitrogen (N), and 110 samples of (d) CaO, (e)  $\text{K}_2\text{O}$ , (f) MgO, (g)  $\text{P}_2\text{O}_5$  in the training set.

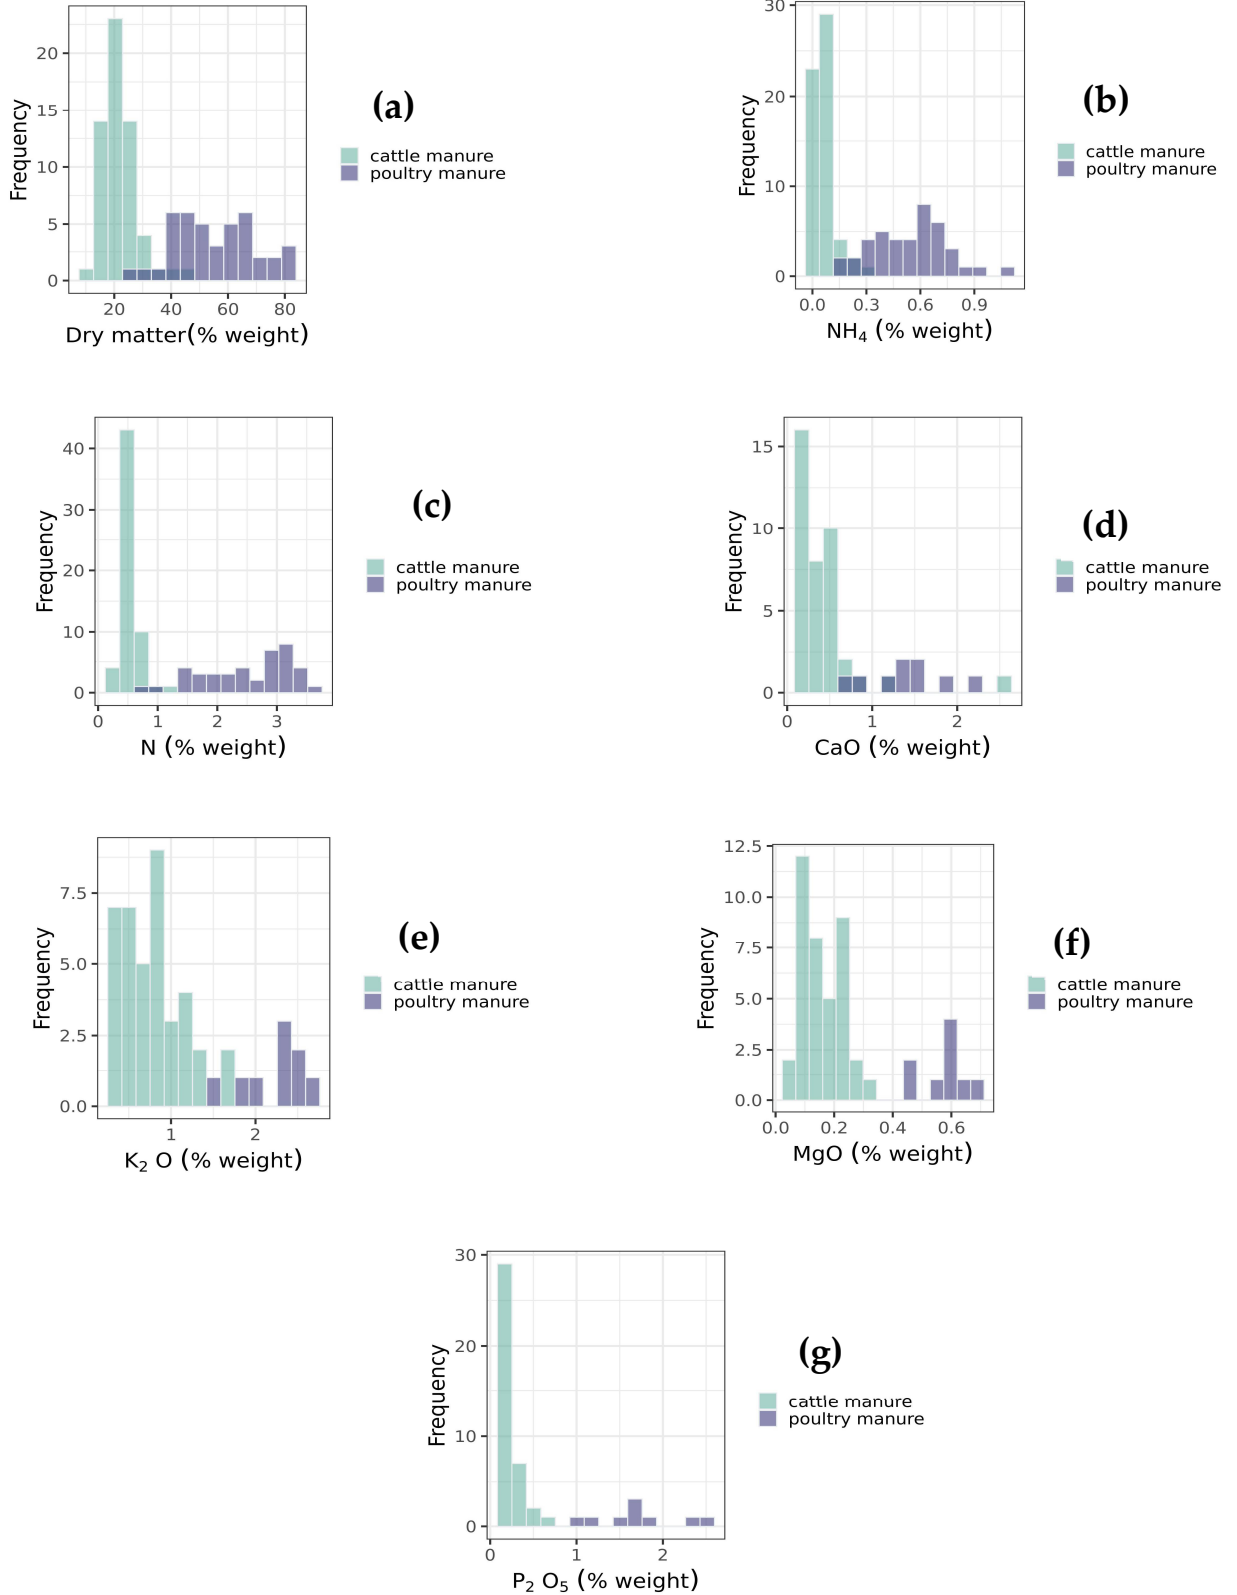

**Figure S10.** Histograms for the 110 samples of (a) dry matter, (b) total ammonium nitrogen ( $\text{NH}_4$ ), (c) total nitrogen (N), and 48 samples of (d) CaO, (e)  $\text{K}_2\text{O}$ , (f) MgO, (g)  $\text{P}_2\text{O}_5$  in the testing set.

## Supplementary tables

**Table S1.** Ranges of hyperparameters used in tuning of best results for various machine learning techniques. A space-filling design with a grid number of 100 is used. There are 100 equally spaced values between (including) each hyperparameter's minimum and maximum values that were used for tuning. For hyperparameters that are meaningful only when the values are integers, i.e., the latent variable (LV) in partial least squares (PLS), non-integer values are just skipped during tuning (SVRLin = support vector with linear kernel; SVRPoly = support vector with polynomial kernel; SVRRad = support vector with radial kernel; LASSO = least absolute shrinkage and selection operator; RIDGE = ridge regression; ENET = elastic net; RF= Random forests; RPART = recursive partitioning and regression trees; XGB = Boosted trees).

### Hyperparameters, ranges

| Algorithm | parameters              | minimum  | maximum |
|-----------|-------------------------|----------|---------|
| SVRLin    | cost(C)                 | 9.77E-04 | 32      |
|           | margin(epsilon)         | 0        | 0.2     |
| SVRPoly   | cost(C)                 | 9.77E-04 | 32      |
|           | degree                  | 1        | 3       |
|           | scale_factor(scale)     | 1.00E-10 | 0.1     |
|           | margin(epsilon)         | 0        | 0.2     |
| SVRRad    | cost(C)                 | 9.77E-04 | 32      |
|           | rbf_sigma(sigma)        | 1.00E-10 | 1       |
|           | margin(epsilon)         | 0        | 0.2     |
| LASSO     | penalty                 | 1.00E-10 | 1       |
|           | mixture (alpha)         | 1        | 1       |
| RIDGE     | penalty                 | 1.00E-10 | 1       |
|           | mixture (alpha)         | 0        | 0       |
| ENET      | penalty                 | 1.00E-10 | 1       |
|           | mixture (alpha)         | 0.05     | 1       |
| PLS       | predictor_prop          | 0        | 1       |
|           | num_comp(ncomp)         | 1        | 4       |
| RF        | mtry                    | 1        | ?*      |
|           | trees(ntree)            | 1        | 2000    |
|           | min_n(min_rows)         | 1        | 40      |
| RPART     | tree_depth(maxdepth)    | 1        | 15      |
|           | min_n(min_rows)         | 2        | 40      |
|           | cost_complexity(cp)     | 1.00E-10 | 0.1     |
| XGB       | tree_depth(maxdepth)    | 1        | 15      |
|           | trees(nrounds)          | 1        | 2000    |
|           | learn_rate(eta)         | 0.001    | 0.316   |
|           | mtry(colsample_bynode)  | 1        | ?*      |
|           | min_n(min_child_weight) | 2        | 40      |
|           | loss_reduction(gamma)   | 1.00E-10 | 31.623  |
|           | sample_size(sub_sample) | 0.1      | 1       |
|           | stop_iter(early_stop)   | 3        | 20      |

\*mtry depends on the number of columns of the predictors and the mode of the model (either regression or classification) which are being computed during the process of tuning.

**Table S2.** Optimized parameters obtained from different machine learning models (SVRLin = support vector with linear kernel; SVRPoly = support vector with polynomial kernel; SVRRad = support vector with radial kernel; LASSO = least absolute shrinkage and selection operator; RIDGE = ridge regression; ENET = elastic net; PLS = partial least squares; RF= Random forests; RPART = recursive partitioning and regression trees; XGB = Boosted trees).

| Algorithm                 | parameters              | DM        | NH4       | N         | P2O5      | CaO       | MgO       | K2O       |
|---------------------------|-------------------------|-----------|-----------|-----------|-----------|-----------|-----------|-----------|
| SVRLin                    | cost(C)                 | 0.119     | 0.054     | 0.216     | 0.136     | 0.149     | 1.064     | 0.101     |
|                           | margin(epsilon)         | 0.062     | 0.122     | 0.078     | 0.122     | 0.049     | 0.168     | 0.015     |
| SVRPoly                   | cost(C)                 | 0.3249    | 0.3249    | 3.3491    | 3.3491    | 26.7003   | 3.3491    | 3.3491    |
|                           | degree                  | 2         | 2         | 1         | 1         | 3         | 1         | 1         |
|                           | scale_factor(scale)     | 0.0049    | 0.0049    | 0.0290    | 0.0290    | 0.0015    | 0.0290    | 0.0290    |
|                           | margin(epsilon)         | 0.0480    | 0.0480    | 0.0968    | 0.0968    | 0.1323    | 0.0968    | 0.0968    |
| SVRRad                    | cost(C)                 | 21.3698   | 5.6840    | 21.3698   | 21.3698   | 21.3698   | 21.3698   | 21.3698   |
|                           | rbf_sigma(sigma)        | 0.00035   | 0.00112   | 0.00035   | 0.00035   | 0.00035   | 0.00035   | 0.00035   |
|                           | margin(epsilon)         | 0.14871   | 0.11354   | 0.14871   | 0.14871   | 0.14871   | 0.14871   | 0.14871   |
| LASSO                     | penalty                 | 1.133E-10 |
|                           | mixture (alpha)         | 1         | 1         | 1         | 1         | 1         | 1         | 1         |
| RIDGE                     | penalty                 | 1.133E-10 |
|                           | mixture (alpha)         | 0         | 0         | 0         | 0         | 0         | 0         | 0         |
| ENET                      | penalty                 | 1.312E-10 | 5.186E-07 | 2.076E-05 | 1.312E-10 | 9.369E-08 | 1.620E-07 | 2.076E-05 |
|                           | mixture (alpha)         | 0.9616    | 0.8071    | 0.9868    | 0.9616    | 0.9692    | 0.4144    | 0.9868    |
| PLS                       | predictor_prop          | 0.8080    | 0.3335    | 0.8080    | 0.9532    | 0.1933    | 0.9381    | 0.2586    |
|                           | num_comp(ncomp)         | 7         | 9         | 7         | 9         | 10        | 11        | 9         |
| RF                        | mtry                    | 90        | 112       | 41        | 112       | 446       | 137       | 137       |
|                           | trees(ntree)            | 1799      | 1741      | 973       | 1741      | 1039      | 1288      | 1288      |
|                           | min_n(min_rows)         | 3         | 3         | 9         | 3         | 4         | 3         | 3         |
| RPART                     | tree_depth(maxdepth)    | 10        | 11        | 5         | 3         | 4         | 12        | 3         |
|                           | min_n(min_rows)         | 7         | 13        | 5         | 30        | 11        | 29        | 15        |
|                           | cost_complexity(cp)     | 3.12E-05  | 6.483E-08 | 5.650E-07 | 9.964E-05 | 2.943E-07 | 1.679E-05 | 3.906E-04 |
| XGB                       | tree_depth(maxdepth)    | 13        | 10        | 10        | 7         | 10        | 4         | 10        |
|                           | trees(nrounds)          | 1594      | 1662      | 1662      | 813       | 1662      | 1305      | 1662      |
|                           | learn_rate(eta)         | 0.077     | 0.011     | 0.011     | 0.182     | 0.011     | 0.042     | 0.011     |
|                           | mtry(colsample_bynode)  | 31        | 45        | 45        | 596       | 45        | 235       | 45        |
|                           | min_n(min_child_weight) | 28        | 14        | 14        | 2         | 14        | 8         | 14        |
|                           | loss_reduction(gamma)   | 4.03E-09  | 5.905E-09 | 5.905E-09 | 3.287E-05 | 5.905E-09 | 1.401E-07 | 5.905E-09 |
|                           | sample_size(sub_sample) | 0.7197    | 0.6952    | 0.6952    | 0.4932    | 0.6952    | 0.8133    | 0.6952    |
|                           | stop_iter(early_stop)   | 16        | 4         | 4         | 8         | 4         | 11        | 4         |
| Stacked Regression (ENET) | penalty                 | 0.7374    | 0.0303    | 0.0202    | 0.0202    | 1         | 0.4848    | 0.0404    |
|                           | mixture (alpha)         | 0.3434    | 0.8485    | 1         | 0.8990    | 0.0101    | 0.0101    | 1         |

**Table S3.** The top 10 (or 7) highest weighted (stacking coefficient) members of a stacked ensemble of different models with non-zero coefficients for each of the chemical contents: dry matter (DM), total ammonium nitrogen (NH<sub>4</sub>), total nitrogen (N), phosphorus pentoxide (P<sub>2</sub>O<sub>5</sub>), calcium oxide (CaO), magnesium oxide (MgO), and potassium oxide (K<sub>2</sub>O) (SVRLin = support vector with linear kernel; SVRPoly = support vector with polynomial kernel; SVRRad = support vector with radial kernel; LASSO = least absolute shrinkage and selection operator; RIDGE = ridge regression; ENET = elastic net; PLS = partial least squares; RF= Random forests; RPART = recursive partitioning and regression trees; XGB = Boosted trees).

| Chemicals                     | Algorithm | Model members | Stacking coefficients or weight | Description                                |
|-------------------------------|-----------|---------------|---------------------------------|--------------------------------------------|
| DM                            | XGB       | XGB_1_108     | 2.926                           | The 10 highest weighted members out of 23  |
|                               | SVRPoly   | SVRPoly_1_066 | 0.110                           |                                            |
|                               | SVRPoly   | SVRPoly_1_065 | 0.108                           |                                            |
|                               | SVRPoly   | SVRPoly_1_020 | 0.084                           |                                            |
|                               | SVRPoly   | SVRPoly_1_083 | 0.079                           |                                            |
|                               | SVRRad    | SVRRad_1_064  | 0.072                           |                                            |
|                               | SVRLin    | SVRLin_1_094  | 0.069                           |                                            |
|                               | SVRLin    | SVRLin_1_035  | 0.056                           |                                            |
|                               | SVRRad    | SVRRad_1_100  | 0.056                           |                                            |
|                               | SVRLin    | SVRLin_1_050  | 0.054                           |                                            |
| NH <sub>4</sub>               | SVRPoly   | SVRPoly_1_065 | 0.158                           | The 10 highest weighted members out of 30  |
|                               | SVRRad    | SVRRad_1_086  | 0.092                           |                                            |
|                               | SVRPoly   | SVRPoly_1_020 | 0.091                           |                                            |
|                               | XGB       | XGB_1_051     | 0.078                           |                                            |
|                               | SVRLin    | SVRLin_1_087  | 0.073                           |                                            |
|                               | SVRLin    | SVRLin_1_046  | 0.067                           |                                            |
|                               | SVRRad    | SVRRad_1_037  | 0.062                           |                                            |
|                               | SVRRad    | SVRRad_1_100  | 0.054                           |                                            |
|                               | SVRLin    | SVRLin_1_057  | 0.051                           |                                            |
|                               | SVRRad    | SVRRad_1_064  | 0.033                           |                                            |
| N                             | SVRPoly   | SVRPoly_1_066 | 0.274                           | The 7 highest weighted members out of 7    |
|                               | SVRRad    | SVRRad_1_087  | 0.235                           |                                            |
|                               | SVRLin    | SVRLin_1_060  | 0.184                           |                                            |
|                               | SVRRad    | SVRRad_1_037  | 0.179                           |                                            |
|                               | SVRLin    | SVRLin_1_054  | 0.116                           |                                            |
|                               | SVRPoly   | SVRPoly_1_083 | 0.006                           |                                            |
|                               | XGB       | XGB_1_051     | 0.005                           |                                            |
| P <sub>2</sub> O <sub>5</sub> | SVRRad    | SVRRad_1_100  | 0.218                           | The 10 highest weighted members out of 11  |
|                               | XGB       | XGB_1_087     | 0.195                           |                                            |
|                               | PLS       | PLS_1_086     | 0.193                           |                                            |
|                               | SVRRad    | SVRRad_1_064  | 0.179                           |                                            |
|                               | SVRPoly   | SVRPoly_1_083 | 0.153                           |                                            |
|                               | PLS       | PLS_1_054     | 0.121                           |                                            |
|                               | XGB       | XGB_1_066     | 0.051                           |                                            |
|                               | PLS       | PLS_1_098     | 0.030                           |                                            |
|                               | XGB       | XGB_1_067     | 0.014                           |                                            |
|                               | XGB       | XGB_1_021     | 0.012                           |                                            |
| CaO                           | SVRRad    | SVRRad_1_100  | 0.039                           | The 10 highest weighted members out of 152 |
|                               | SVRRad    | SVRRad_1_087  | 0.038                           |                                            |
|                               | SVRRad    | SVRRad_1_086  | 0.036                           |                                            |
|                               | SVRRad    | SVRRad_1_037  | 0.034                           |                                            |
|                               | SVRPoly   | SVRPoly_1_028 | 0.034                           |                                            |
|                               | SVRPoly   | SVRPoly_1_036 | 0.031                           |                                            |

|                  |         |               |       |                                            |
|------------------|---------|---------------|-------|--------------------------------------------|
|                  | SVRPoly | SVRPoly_1_066 | 0.030 | The 10 highest weighted members out of 249 |
|                  | SVRPoly | SVRPoly_1_020 | 0.030 |                                            |
|                  | SVRPoly | SVRPoly_1_083 | 0.030 |                                            |
|                  | SVRPoly | SVRPoly_1_065 | 0.029 |                                            |
| MgO              | XGB     | XGB_1_036     | 6.000 |                                            |
|                  | XGB     | XGB_1_006     | 0.038 |                                            |
|                  | XGB     | XGB_1_087     | 0.017 |                                            |
|                  | SVRPoly | SVRPoly_1_020 | 0.014 |                                            |
|                  | SVRPoly | SVRPoly_1_028 | 0.012 |                                            |
|                  | XGB     | XGB_1_022     | 0.011 |                                            |
|                  | SVRPoly | SVRPoly_1_083 | 0.010 |                                            |
|                  | SVRPoly | SVRPoly_1_010 | 0.009 |                                            |
|                  | PLS     | PLS_1_023     | 0.009 |                                            |
|                  | PLS     | PLS_1_083     | 0.009 |                                            |
| K <sub>2</sub> O | SVRLin  | SVRLin_1_074  | 0.568 | The 7 highest weighted members out of 7    |
|                  | XGB     | XGB_1_022     | 0.194 |                                            |
|                  | XGB     | XGB_1_079     | 0.169 |                                            |
|                  | SVRRad  | SVRRad_1_100  | 0.081 |                                            |
|                  | SVRPoly | SVRPoly_1_040 | 0.021 |                                            |
|                  | RPART   | RPART_1_059   | 0.018 |                                            |
|                  | SVRRad  | SVRRad_1_064  | 0.012 |                                            |

**Table S4.** Statistical significance table that compares the ratio of the standard errors between two algorithms with that of the critical F-value in the training set ( $F_{critical} = 1.242$  at 231 degrees of freedom for DM, NH<sub>4</sub> and N;  $F_{critical} = 1.372$  at 109 degree of freedom for P<sub>2</sub>O<sub>5</sub>, CaO, MgO and K<sub>2</sub>O). In calculating the ratio, the best performing algorithm for each of the chemical components was used as the denominator. If the ratio is less than the critical F-value then the two RMSE values are not significantly different.

| Algorithm | DM    |                    | NH <sub>4</sub> |                    | N     |                    | P <sub>2</sub> O <sub>5</sub> |                    | CaO   |                    | MgO   |                    | K <sub>2</sub> O |                    |
|-----------|-------|--------------------|-----------------|--------------------|-------|--------------------|-------------------------------|--------------------|-------|--------------------|-------|--------------------|------------------|--------------------|
|           | ratio | ratio < crit. val? | ratio           | ratio < crit. val? | ratio | ratio < crit. val? | ratio                         | ratio < crit. val? | ratio | ratio < crit. val? | ratio | ratio < crit. val? | ratio            | ratio < crit. val? |
| SVRLin    | 1.445 | No                 | 1.351           | No                 | 1.311 | No                 | 1.270                         | Yes                | 1.669 | No                 | 1.000 | Yes                | 1.000            | Yes                |
| SVRPoly   | 1.000 | Yes                | 1.112           | Yes                | 1.356 | No                 | 1.384                         | No                 | 1.295 | Yes                | 1.104 | Yes                | 1.050            | Yes                |
| SVRRad    | 1.050 | Yes                | 1.000           | Yes                | 1.000 | Yes                | 1.000                         | Yes                | 1.000 | Yes                | 1.159 | Yes                | 1.138            | Yes                |
| LASSO     | 1.704 | No                 | 1.744           | No                 | 1.542 | No                 | 1.532                         | No                 | 1.820 | No                 | 1.495 | No                 | 1.262            | Yes                |
| RIDGE     | 5.030 | No                 | 3.765           | No                 | 4.456 | No                 | 2.696                         | No                 | 2.457 | No                 | 2.127 | No                 | 6.131            | No                 |
| ENET      | 1.702 | No                 | 1.735           | No                 | 1.542 | No                 | 1.531                         | No                 | 1.815 | No                 | 1.450 | No                 | 1.265            | Yes                |
| PLS       | 2.232 | No                 | 1.957           | No                 | 2.319 | No                 | 2.119                         | No                 | 2.299 | No                 | 2.075 | No                 | 1.373            | No                 |
| RF        | 2.293 | No                 | 1.930           | No                 | 2.240 | No                 | 2.630                         | No                 | 1.864 | No                 | 1.592 | No                 | 1.904            | No                 |
| RPART     | 4.224 | No                 | 3.625           | No                 | 4.514 | No                 | 4.506                         | No                 | 2.476 | No                 | 2.326 | No                 | 3.132            | No                 |
| XGB       | 1.565 | No                 | 1.544           | No                 | 1.854 | No                 | 1.901                         | No                 | 1.710 | No                 | 1.549 | No                 | 1.670            | No                 |

**Table S5.** Statistical significance table that compares the ratio of the standard errors between two algorithms with that of the critical F-value in the testing set ( $F_{critical} = 1.394$  at 99 degrees of freedom for DM, NH<sub>4</sub> and N;  $F_{critical} = 1.624$  at 47 degrees of freedom for P<sub>2</sub>O<sub>5</sub>, CaO, MgO and K<sub>2</sub>O). In calculating the ratio, the best performing algorithm for each of the chemical components was used as the denominator. If the ratio is less than the critical F-value then the two RMSE values are not significantly different.

| Algorithm | DM      |            | NH <sub>4</sub> |            | N       |            | P <sub>2</sub> O <sub>5</sub> |            | CaO     |            | MgO     |            | K <sub>2</sub> O |            |
|-----------|---------|------------|-----------------|------------|---------|------------|-------------------------------|------------|---------|------------|---------|------------|------------------|------------|
|           | ratio < |            | ratio <         |            | ratio < |            | ratio <                       |            | ratio < |            | ratio < |            | ratio <          |            |
|           | ratio   | crit. val? | ratio           | crit. val? | ratio   | crit. val? | ratio                         | crit. val? | ratio   | crit. val? | ratio   | crit. val? | ratio            | crit. val? |
| SVRLin    | 2.857   | No         | 1.843           | No         | 2.499   | No         | 1.294                         | Yes        | 1.081   | Yes        | 1.528   | Yes        | 1.140            | Yes        |
| SVRPoly   | 1.592   | No         | 1.991           | No         | 2.542   | No         | 1.303                         | Yes        | 1.753   | No         | 1.362   | Yes        | 1.138            | Yes        |
| SVRRad    | 1.499   | No         | 2.703           | No         | 1.351   | Yes        | 1.047                         | Yes        | 1.457   | Yes        | 1.000   | Yes        | 1.005            | Yes        |
| LASSO     | 3.063   | No         | 2.220           | No         | 2.875   | No         | 1.387                         | Yes        | 1.170   | Yes        | 1.366   | Yes        | 1.216            | Yes        |
| RIDGE     | 5.183   | No         | 3.422           | No         | 5.415   | No         | 2.098                         | No         | 1.625   | No         | 1.899   | No         | 1.597            | Yes        |
| ENET      | 3.019   | No         | 2.231           | No         | 2.900   | No         | 1.388                         | Yes        | 1.173   | Yes        | 1.330   | Yes        | 1.218            | Yes        |
| PLS       | 4.474   | No         | 3.099           | No         | 4.270   | No         | 1.413                         | Yes        | 1.271   | Yes        | 1.400   | Yes        | 1.394            | Yes        |
| RF        | 2.145   | No         | 2.682           | No         | 2.439   | No         | 2.783                         | No         | 1.512   | Yes        | 2.407   | No         | 1.591            | Yes        |
| RPART     | 7.619   | No         | 5.544           | No         | 6.793   | No         | 3.546                         | No         | 1.488   | Yes        | 3.443   | No         | 1.559            | Yes        |
| XGB       | 1.905   | No         | 2.220           | No         | 1.648   | No         | 2.898                         | No         | 1.729   | No         | 2.898   | No         | 1.229            | Yes        |
| Stack Reg | 1.000   | Yes        | 1.000           | Yes        | 1.000   | Yes        | 1.000                         | Yes        | 1.000   | Yes        | 1.399   | Yes        | 1.000            | Yes        |
